# Supplementary material for: The Causal Effect of Education on Myopia: Evidence That More Exposure to Schooling, Rather Than Increased Age, Causes the Onset of Myopia
Source: PubMed Central journal article supplement — Invest Ophthalmol Vis Sci. 2023 Apr 21;64(4):25. doi: 10.1167/iovs.64.4.25 (PMC10132316; doi:10.1167/iovs.64.4.25), 2023-04-21

## Supplementary figures.

Supplementary Figure 1. The regression discontinuity analysis and plots of the youngest block vs. middle block (A), middle block vs. oldest block (B) in Grade 1, and youngest block vs middle block (C), middle block vs. oldest block (D) in Grade 2, in 2018 visit.

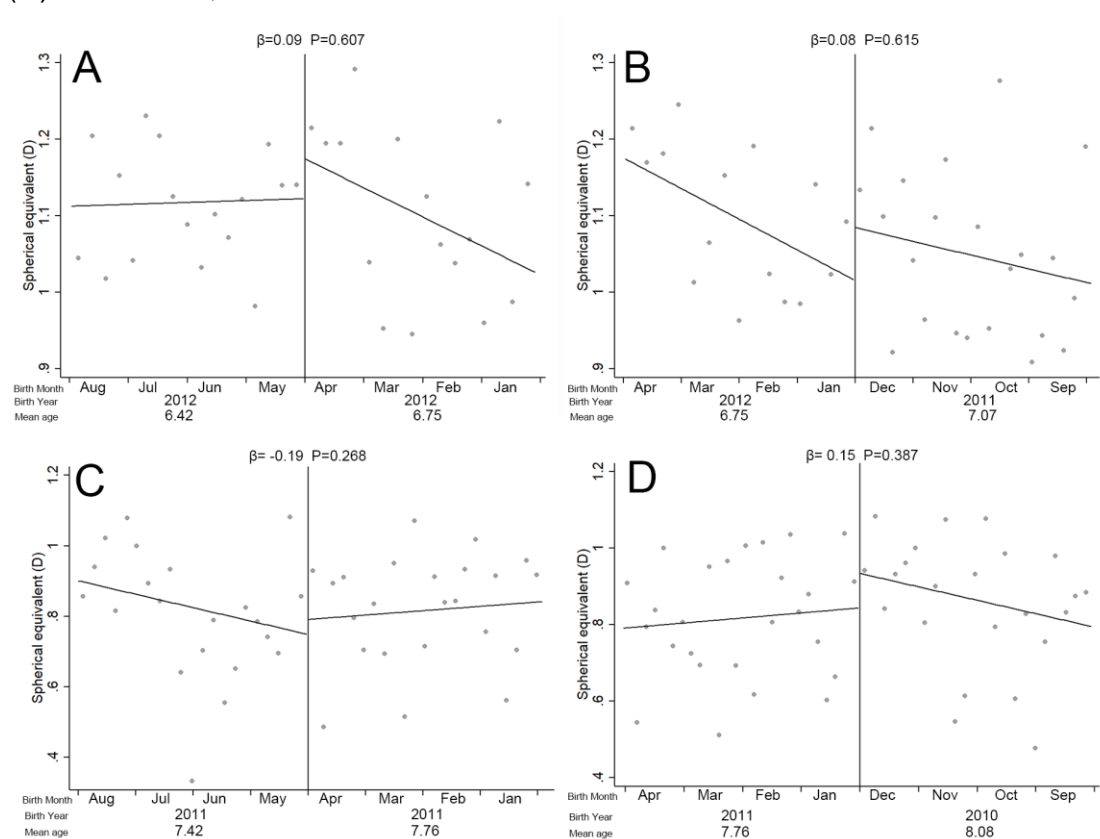

Solid line: local linear regression line by different blocks.

Solid vertical line: The cut-off between different blocks.

Dots denote observed bins.

Supplementary Figure 2. The regression discontinuity analysis and plots of the youngest block vs. middle block (A), middle block vs. oldest block (B) in Grade 2, and youngest block vs middle block (C), middle block vs. oldest block (D) in Grade 3, in 2019 visit.

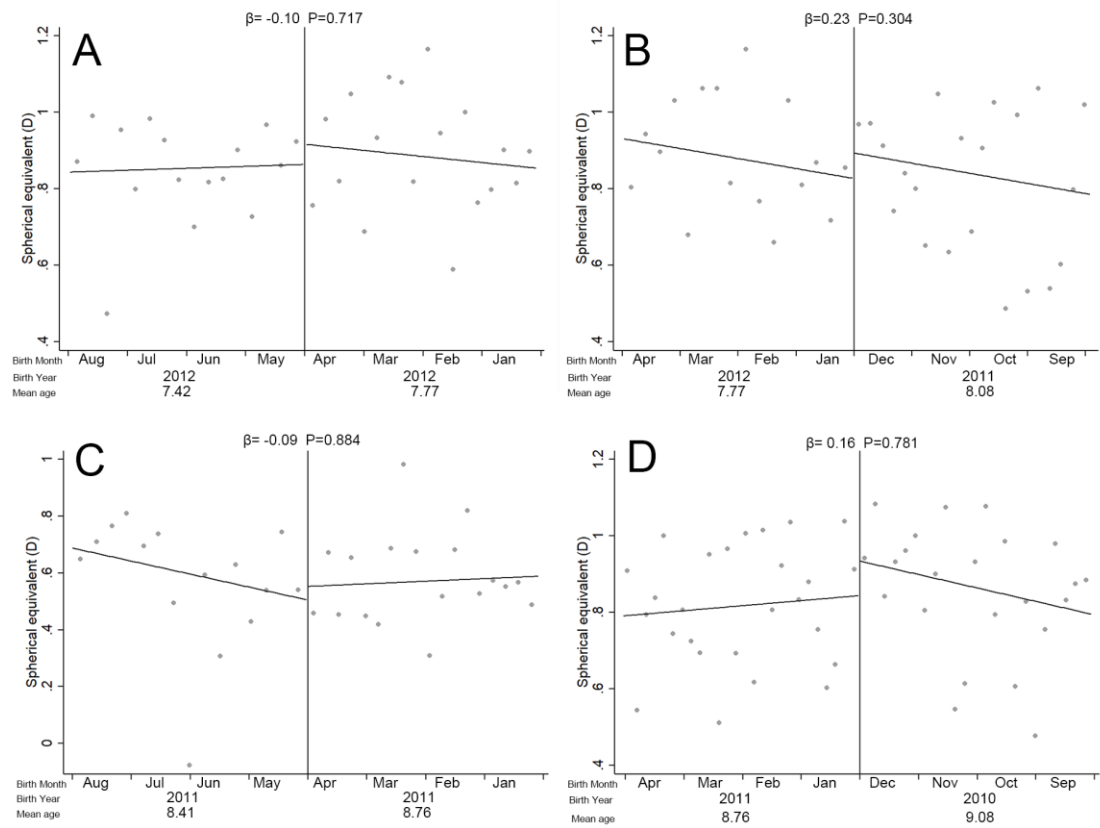

Solid line: local linear regression line by different blocks.

Solid vertical line: The cut-off between different blocks.

Dots denote observed bins.

Supplementary Figure 3. The manipulation test plot at the cut-off point of the significant increase.

A: Cut-off point across grade 1 and grade 2. B: Cut-off point across grade 2 and grade 3.

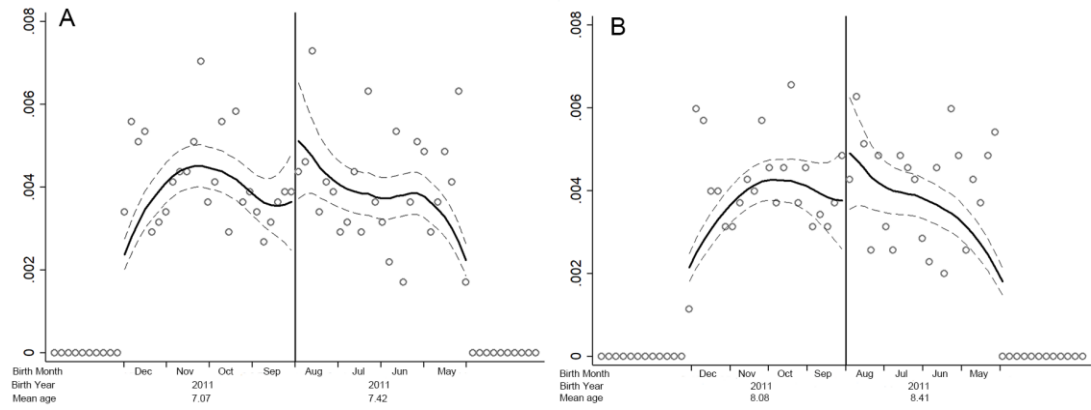

Supplement: iovs-64-4-25_s001.pdf [file iovs-64-4-25_s001.pdf]
